# Supplementary material for: Single Administration of Intracameral Bimatoprost Implant 10 µg in Patients with Open-Angle Glaucoma or Ocular Hypertension
Source: PubMed Central journal article supplement — Ophthalmol Ther. 2022 May 28;11(4):1517–37. doi: 10.1007/s40123-022-00527-6 (PMC9253216; doi:10.1007/s40123-022-00527-6), 2022-05-28
Supplement: 40123_2022_527_MOESM1_ESM.pdf [file 40123_2022_527_MOESM1_ESM.pdf]

## Electronic Supplementary Material

Single Administration of Intracameral Bimatoprost Implant 10 µg in Patients With Open-Angle Glaucoma or Ocular Hypertension

Felipe A. Medeiros, MD, PhD,<sup>1</sup> Arsham Sheybani, MD,<sup>2</sup> Manjool M. Shah, MD,<sup>3</sup> Marcos Rivas, PhD,<sup>4</sup> Zhanying Bai, MS,<sup>5</sup> Erica Werts, PharmD,<sup>4</sup> Iqbal IK Ahmed, MD,<sup>6</sup> E Randy Craven, MD<sup>4</sup>

<sup>1</sup>Department of Ophthalmology, Duke University, Durham, North Carolina, USA; <sup>2</sup>Department of Ophthalmology and Visual Sciences, Washington University in St. Louis School of Medicine, St. Louis, Missouri, USA; <sup>3</sup>Kellogg Eye Center, Ann Arbor, Michigan, USA; <sup>4</sup>Allergan, an AbbVie company, Irvine, California, USA; <sup>5</sup>Allergan, an AbbVie company, Irvine, California, USA, at the time of this work; <sup>6</sup>Department of Ophthalmology, University of Toronto, Mississauga, Ontario, Canada

Corresponding author: Felipe A. Medeiros, MD, PhD; Duke Eye Center, 2351 Erwin Rd, Durham, NC, USA 27705; E-mail: [felipe.medeiros@duke.edu](mailto:felipe.medeiros@duke.edu)

**Table S1. Baseline Demographics of the 10- $\mu$ g Bimatoprost Implant Treatment Group in the Phase 1/2 Study**

| Characteristic              | 10- $\mu$ g Bimatoprost Implant<br>(N=21) |
|-----------------------------|-------------------------------------------|
| Age, mean (SD), years       | 65.4 (6.6)                                |
| Range                       | 52–77                                     |
| Male, n (%)                 | 12 (57.1)                                 |
| Race/ethnicity, n (%)       |                                           |
| White                       | 15 (71.4)                                 |
| Black or African American   | 4 (19.0)                                  |
| Hispanic                    | 1 (4.8)                                   |
| Asian                       | 1 (4.8)                                   |
| Diagnosis, n (%)            |                                           |
| POAG (both eyes)            | 21 (100)                                  |
| Lens status, n (%)          |                                           |
| Phakic (both eyes)          | 14 (66.7)                                 |
| Pseudophakic (both eyes)    | 7 (33.3)                                  |
| IOP, mean (SD), mmHg        |                                           |
| Hour 0 (8 AM) (study eye)   | 24.5 (2.1)                                |
| Hour 2 (10 AM) (study eye)  | 23.6 (1.9)                                |
| Hour 0 (8 AM) (fellow eye)  | 24.1 (2.1)                                |
| Hour 2 (10 AM) (fellow eye) | 23.1 (2.4)                                |
| CECD, mean (SD), $\mu$ m    |                                           |
| Study eye                   | 2691.3 (175.7)                            |
| Fellow eye                  | 2650.4 (201.9)                            |

CECD = central corneal endothelial cell density; IOP = intraocular pressure;  
POAG = primary open-angle glaucoma; SD = standard deviation.
